# Supplementary material for: Bioinspired colloidal crystal hydrogel pressure sensors with Janus wettability for uterus cervical canal tension perception
Source: Royal Society of Chemistry journal article supplement (doi:10.1039/d4tb01220h), 2024-01-01
Supplement: d4tb01220h3.pdf [file d4tb01220h3.pdf]

1 Supporting Information

2 **Bioinspired colloidal crystals hydrogel pressure sensors with Janus wettability for**  
3 **uterus cervical canal tension perception**

4 *Yufei Chen<sup>1 †</sup>, Yuan Zhou<sup>2 †</sup>, Lihao Zhang<sup>1</sup>, Yue Cao<sup>1</sup>, Sunlong Li<sup>1</sup>, Weipeng Lu<sup>1</sup>, Zheng*

5 *Mao<sup>1</sup>, Zhiwei Jiang<sup>1</sup>, Ying Wang<sup>1</sup>, Cihui Liu<sup>1\*</sup>, Qian Dong,<sup>3,4,5\*</sup>*

6 Supporting Figures

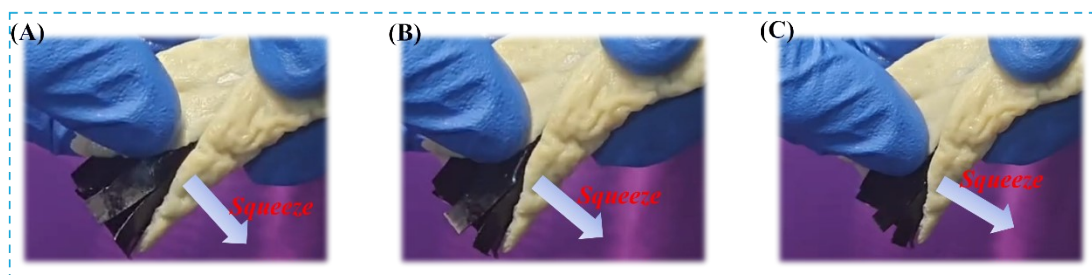

8 **Figure S1.** Hydrogel scaffolds remain well adherent under pressure.

9

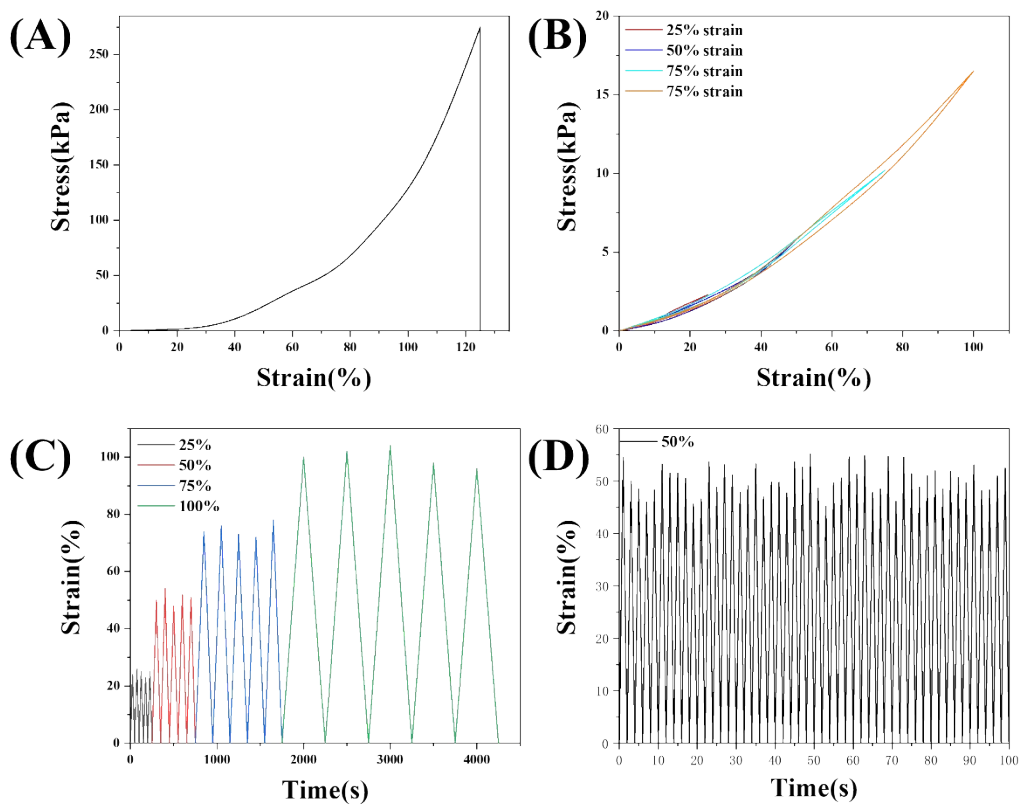

1

2 **Figure S2.** Tensile strain curves of hydrogel sensors. (A) Relationship between the  
 3 tensile force and deformation required to pull the hydrogel sensor to fracture. (B)  
 4 Deformation curves of hydrogel sensors under different tensile forces. (C) Deformation  
 5 degree curve of hydrogel under different tensile force for many times stretching. (D)  
 6 Curves of hydrogel stretching under a large number of experiments.

7

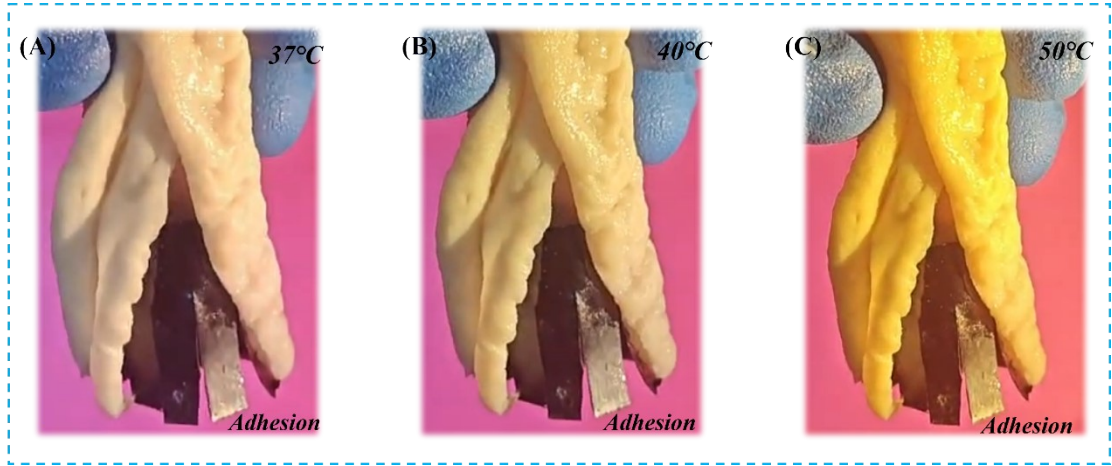

1

2 **Figure S3.** Hydrogel scaffolds remain well adherent under the action of different  
3 temperatures. (A) 37°C. (B) 40°C. (C) 50°C.

4

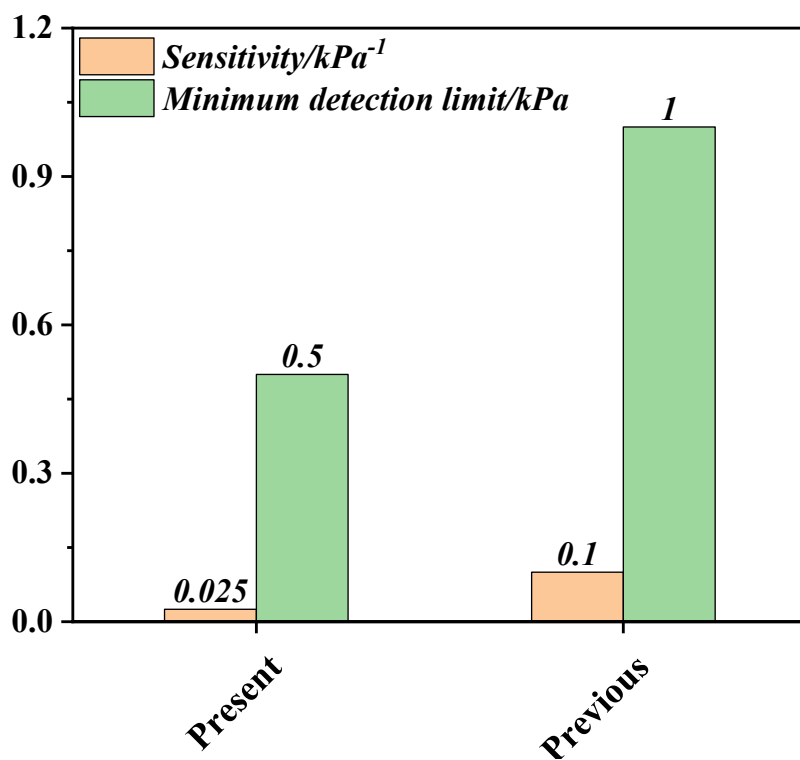

1

2 **Figure S4.** Comparison of sensitivity and minimum detection limit of hydrogel

3 pressure sensors with previous work.

4

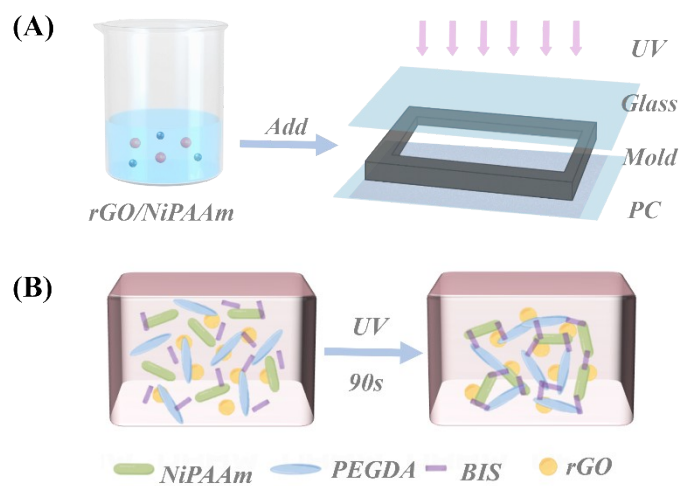

1

2 **Figure S5.** (A) Method of making hydrogels. (B) Components of hydrogels.

3

4

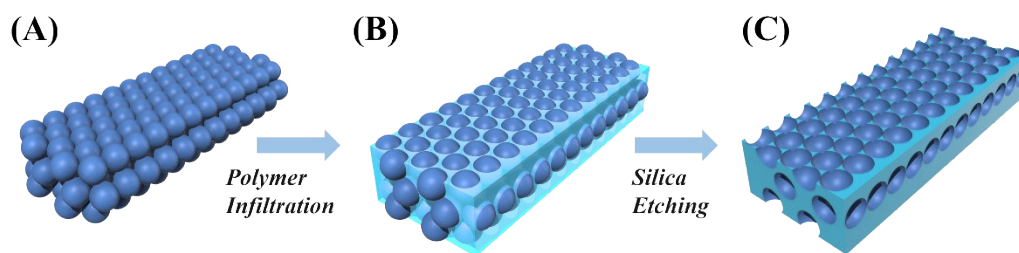

1

2 **Figure S6.** Schematic representation of the preparation of anti-opal structured colour

3 films. (A) Opal template. (B) Polymer-permeable opal template. (C) Independent anti-

4 opal structure.

5

6

---

(A)

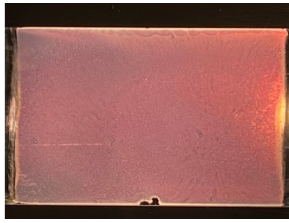

(B)

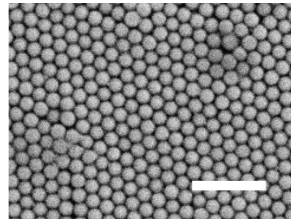

1

2 **Figure S7.** (A) Self-assembly of silica nanoparticles accomplished by horizontal

3 deposition. (B)The SEM image of the colloidal crystal template, scale bar: 1um.

4

---

1

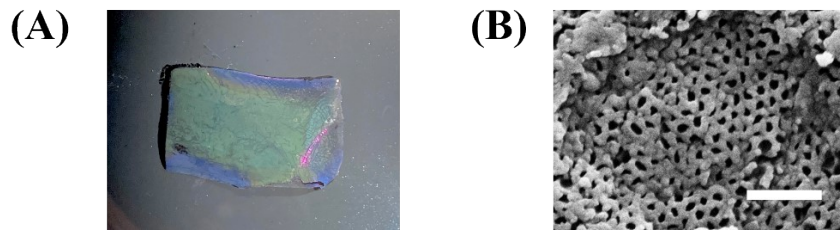

2

3 **Figure S8.** (A) Optical images of hydrogel films of photonic crystals with anti-opal

4 structure. (B)The SEM image of the inverse-opal structured hydrogel film, scale bar:

5 1um.

6

7



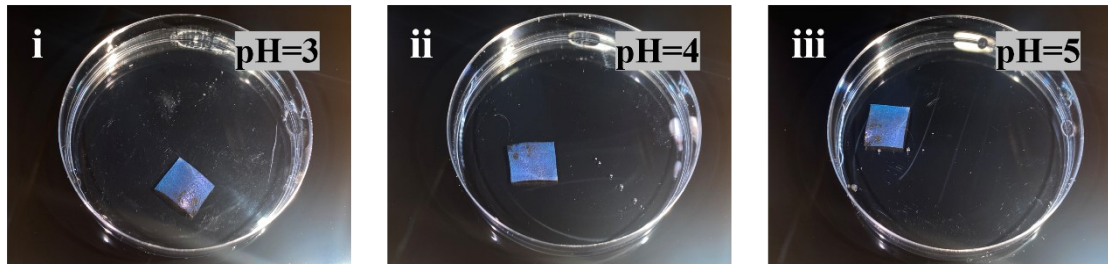

1

2 **Figure S9.** The ambient temperature was set at 37 °C, and the hydrogel films were  
3 immersed in aqueous citric acid solutions with pH values of 3,4,5, respectively, with  
4 no notable changes in color or size.

5

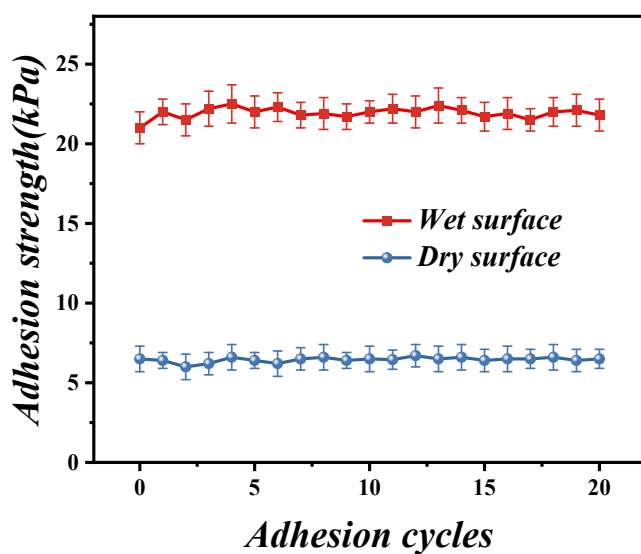

1

2 **Figure S10.** Schematic diagram of the test results of adhesion performance of hydrogel  
3 film scaffolds on the surface of artificial cervix at different humidity. In this experiment,  
4 the effect of humidity on adhesion was quantitatively analyzed through 20 cycles of  
5 adhesion and peeling process. When the surface of the artificial cervix was kept wet,  
6 the adhesion force of the hydrogel film scaffold was stable at about 22 kPa; while in  
7 the dry state, the adhesion force decreased to about 6.5 kPa.

---

1 **Movie S1**

2 **Video of adhesion testing of catheter-based pressure transducers decorated with**

3 **composite hydrogel scaffolds.** The sensor is placed into a moist artificial cervix that

4 mimics a healthy cervix, and the artificial cervix is wiggled up and down without the

5 sensor becoming ectopic or displaced.

6

7

---

1 **Movie S2**

2 **Video of adhesion testing of catheter-based pressure transducers decorated with**

3 **composite hydrogel scaffolds.** A citric acid solution with a pH of 3 was used to

4 simulate the passage of biological fluids on the surface of the cervical tissue, and neither

5 the hydrogel scaffold nor the catheter became ectopic or displaced when the solution

6 dripped.
